# Supplementary material for: Synthesis of spirodithienogermole with triphenylamine units as a dopant-free hole-transporting material for perovskite solar cells
Source: Royal Society of Chemistry journal article supplement (doi:10.1039/d0tc04905k), 2021-01-01
Supplement: d0tc04905k1.pdf [file d0tc04905k1.pdf]

## Synthesis of Siprodithienogermoles with Triphenylamine Units as a Dopant-Free Hole-Transporting Material of Perovskite Solar Cells

Joji Ohshita,<sup>a,b,\*</sup> Keisuke Kondo,<sup>a</sup> Yohei Adachi,<sup>a</sup> Myungkwan Song,<sup>d,\*</sup> Sung-Ho Jin<sup>c,\*</sup>

<sup>a</sup> *Department of Applied Chemistry, Graduate School of Advanced Science and Engineering, Hiroshima University, Higashi-Hiroshima 739-8527, Japan*

<sup>b</sup> *Materials Model-Based Research Division, Digital Monozukuri (Manufacturing) Education and Research Center, Hiroshima University, Higashi-Hiroshima 739-0046, Japan*

<sup>c</sup> *Department of Chemistry Education, Graduate Department of Chemical Materials, Institute for Plastic Information and Energy Materials, Pusan National University, Busandaehakro 63-2, Busan 46241, Republic of Korea*

<sup>d</sup> *Materials Center for Energy Convergence, Surface Technology Division, Korea, Institute of Materials Science (KIMS), 797 Changwondaero, Sungsan-Gu, Changwon, Gyeongnam 642-831, Republic of Korea*

### Supporting Information

**Figure S1.** <sup>1</sup>H and <sup>13</sup>C NMR spectra of **sDTG-tpa** in CDCl<sub>3</sub>.

**Figure S2.** <sup>1</sup>H and <sup>13</sup>C NMR spectra of **sDTG-dmap** in CDCl<sub>3</sub>.

**Figure S3.** <sup>1</sup>H and <sup>13</sup>C NMR spectra of **sDTG-mop** in CDCl<sub>3</sub>.

**Figure S4.** <sup>1</sup>H and <sup>13</sup>C NMR spectra of **m1** in CDCl<sub>3</sub>.

**Figure S5.** <sup>1</sup>H and <sup>13</sup>C NMR spectra of **m2** in acetone-d<sub>6</sub> and CDCl<sub>3</sub>, respectively.

**Figure S6.** Cyclic voltammograms (CVs) of **sDTG-tpa**, **sDTG-dmap**, **sDTG-mop**, **m1**, and **m2**.

**Figure S7.** HOMO and LUMO profiles of **sDTG-tpa**, derived from DFT calculations at B3LYP/6-31G(d,p).

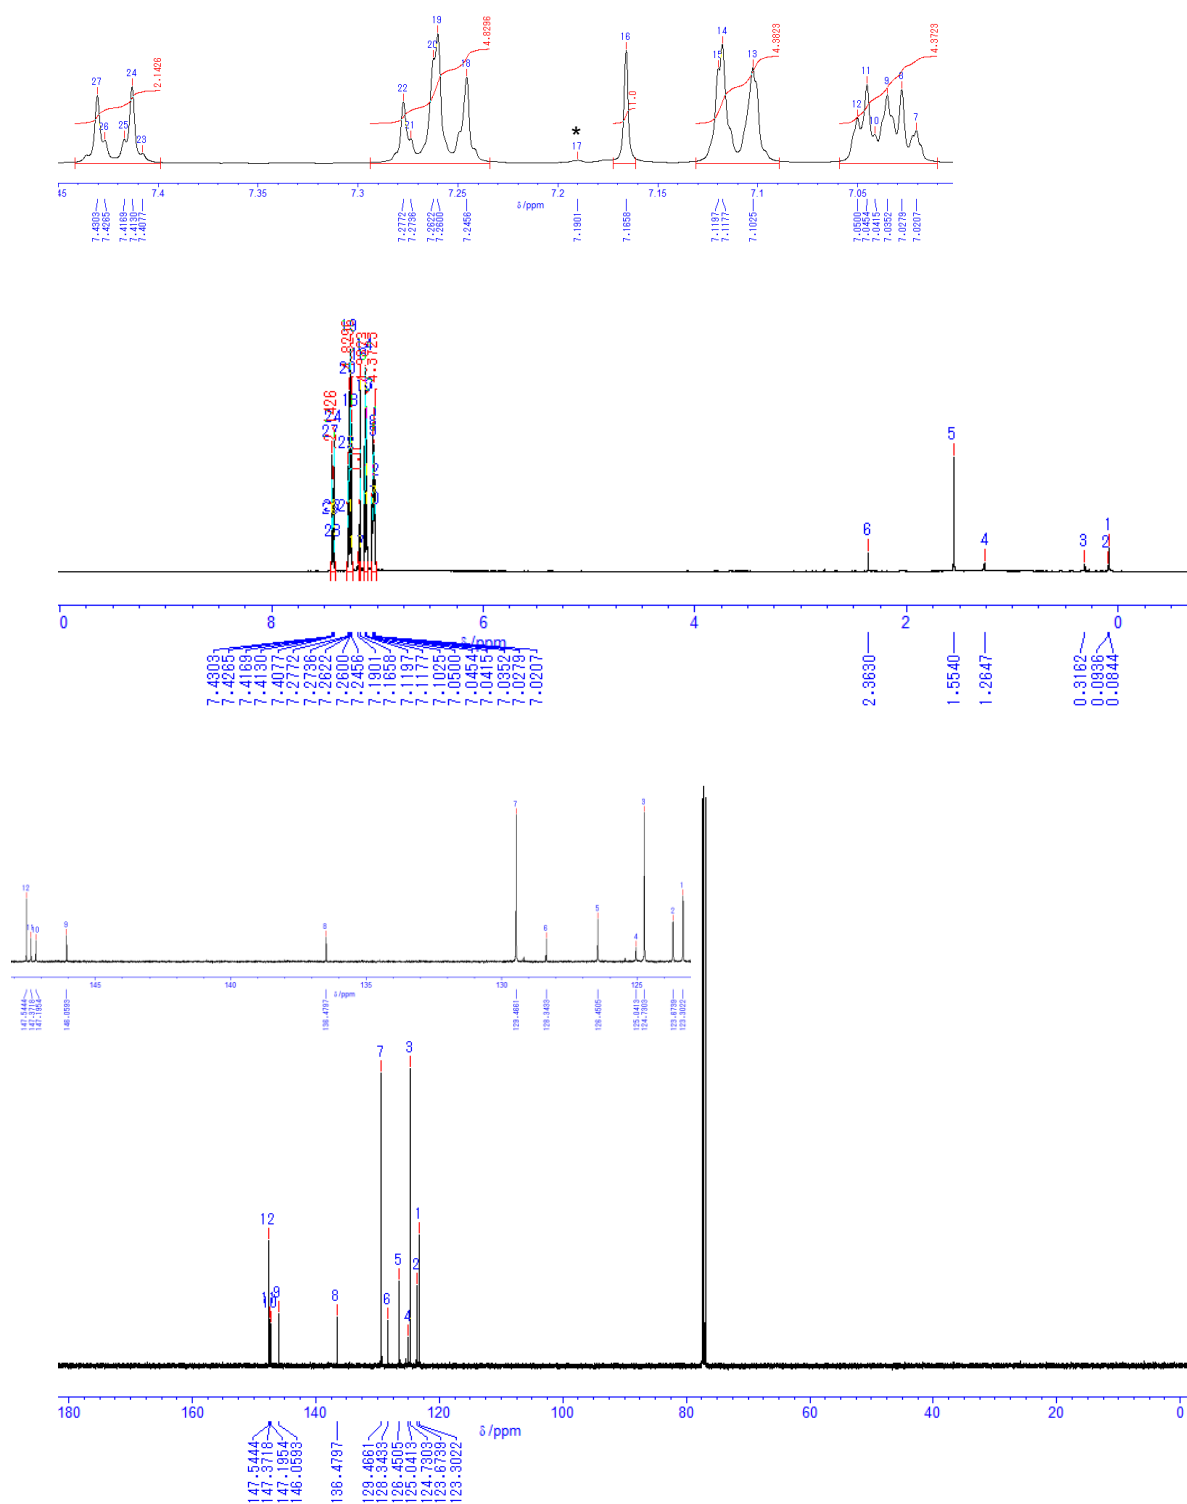

**Figure S1.**  $^1\text{H}$  (top) and  $^{13}\text{C}$  NMR spectra (bottom) of **sDTG-tpa** in  $\text{CDCl}_3$ . An asterisk in the expanded  $^1\text{H}$  NMR spectrum indicates an unidentified signal.

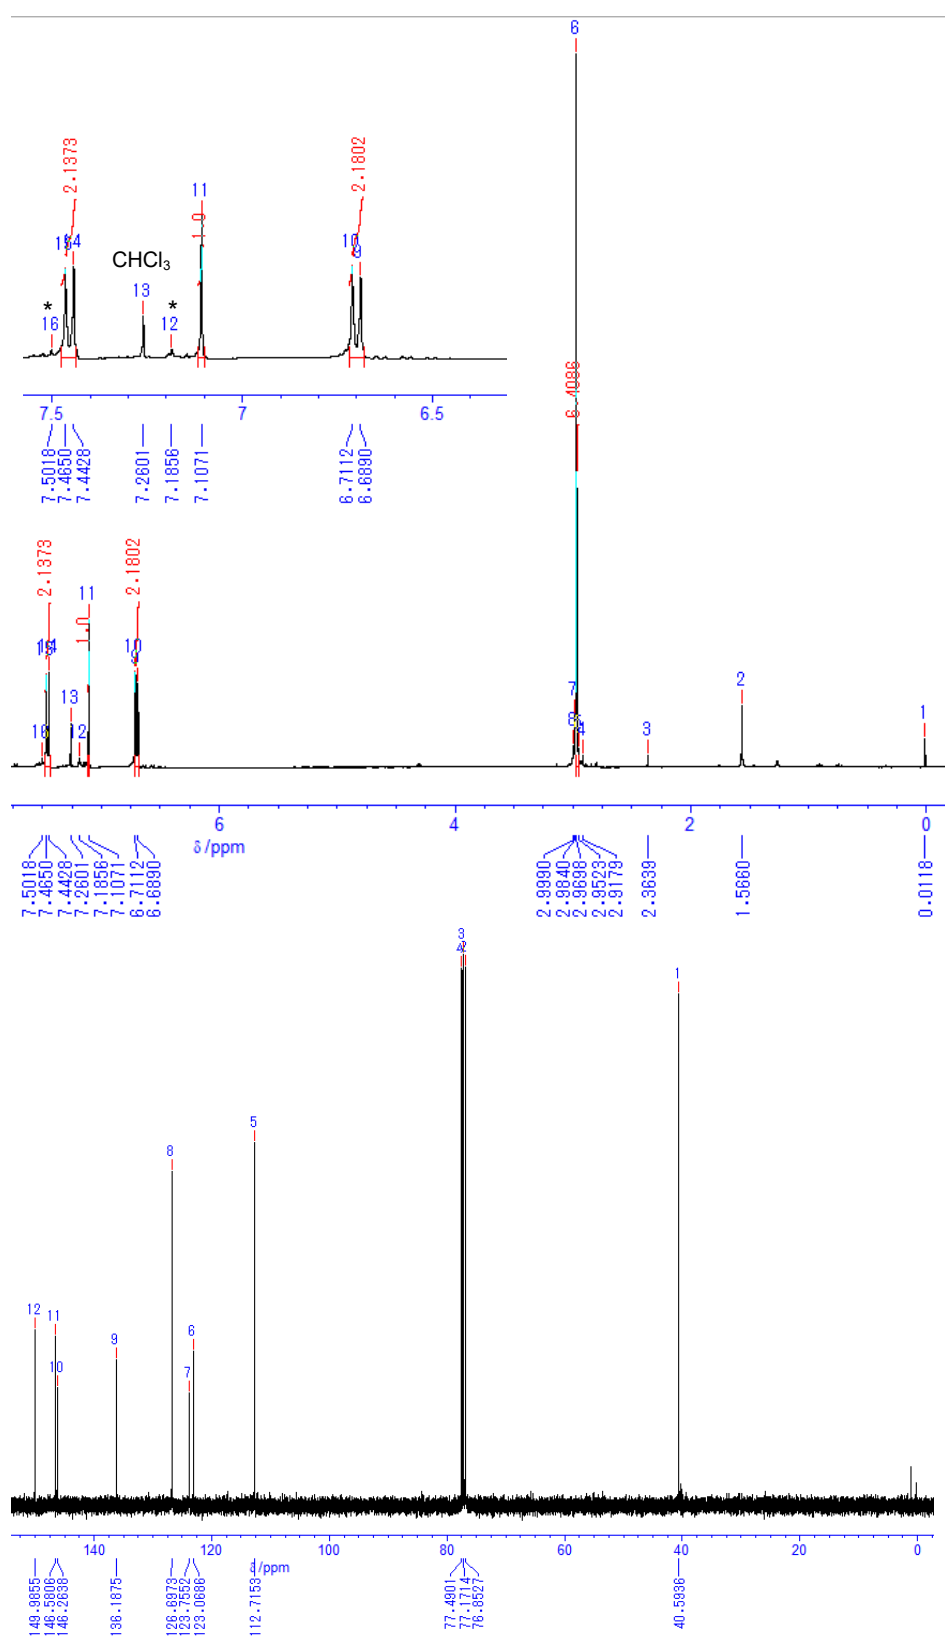

**Figure S2.**  $^1\text{H}$  (top) and  $^{13}\text{C}$  NMR spectra (bottom) of sDTG-dmap in  $\text{CDCl}_3$ . Asterisks in the expanded  $^1\text{H}$  NMR spectrum indicate unidentified signals.

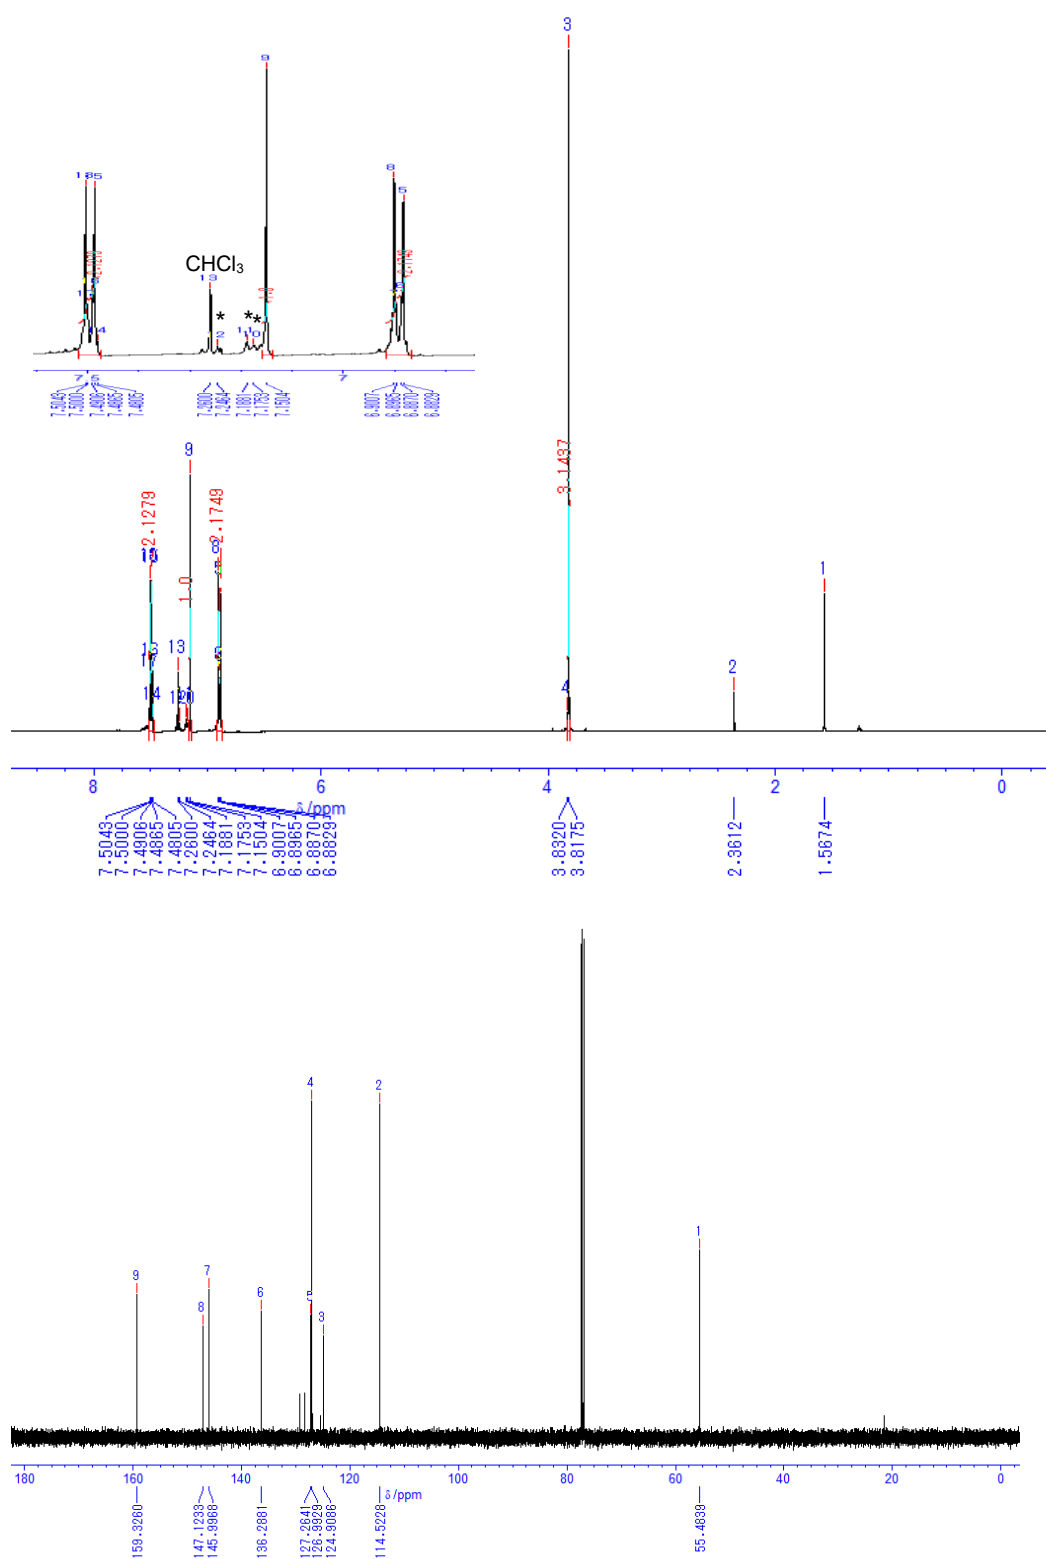

**Figure S3.** <sup>1</sup>H (top) and <sup>13</sup>C NMR spectra (bottom) of **sDTG-mop** in CDCl<sub>3</sub>. Asterisks in the expanded <sup>1</sup>H NMR spectrum indicate unidentified signals.

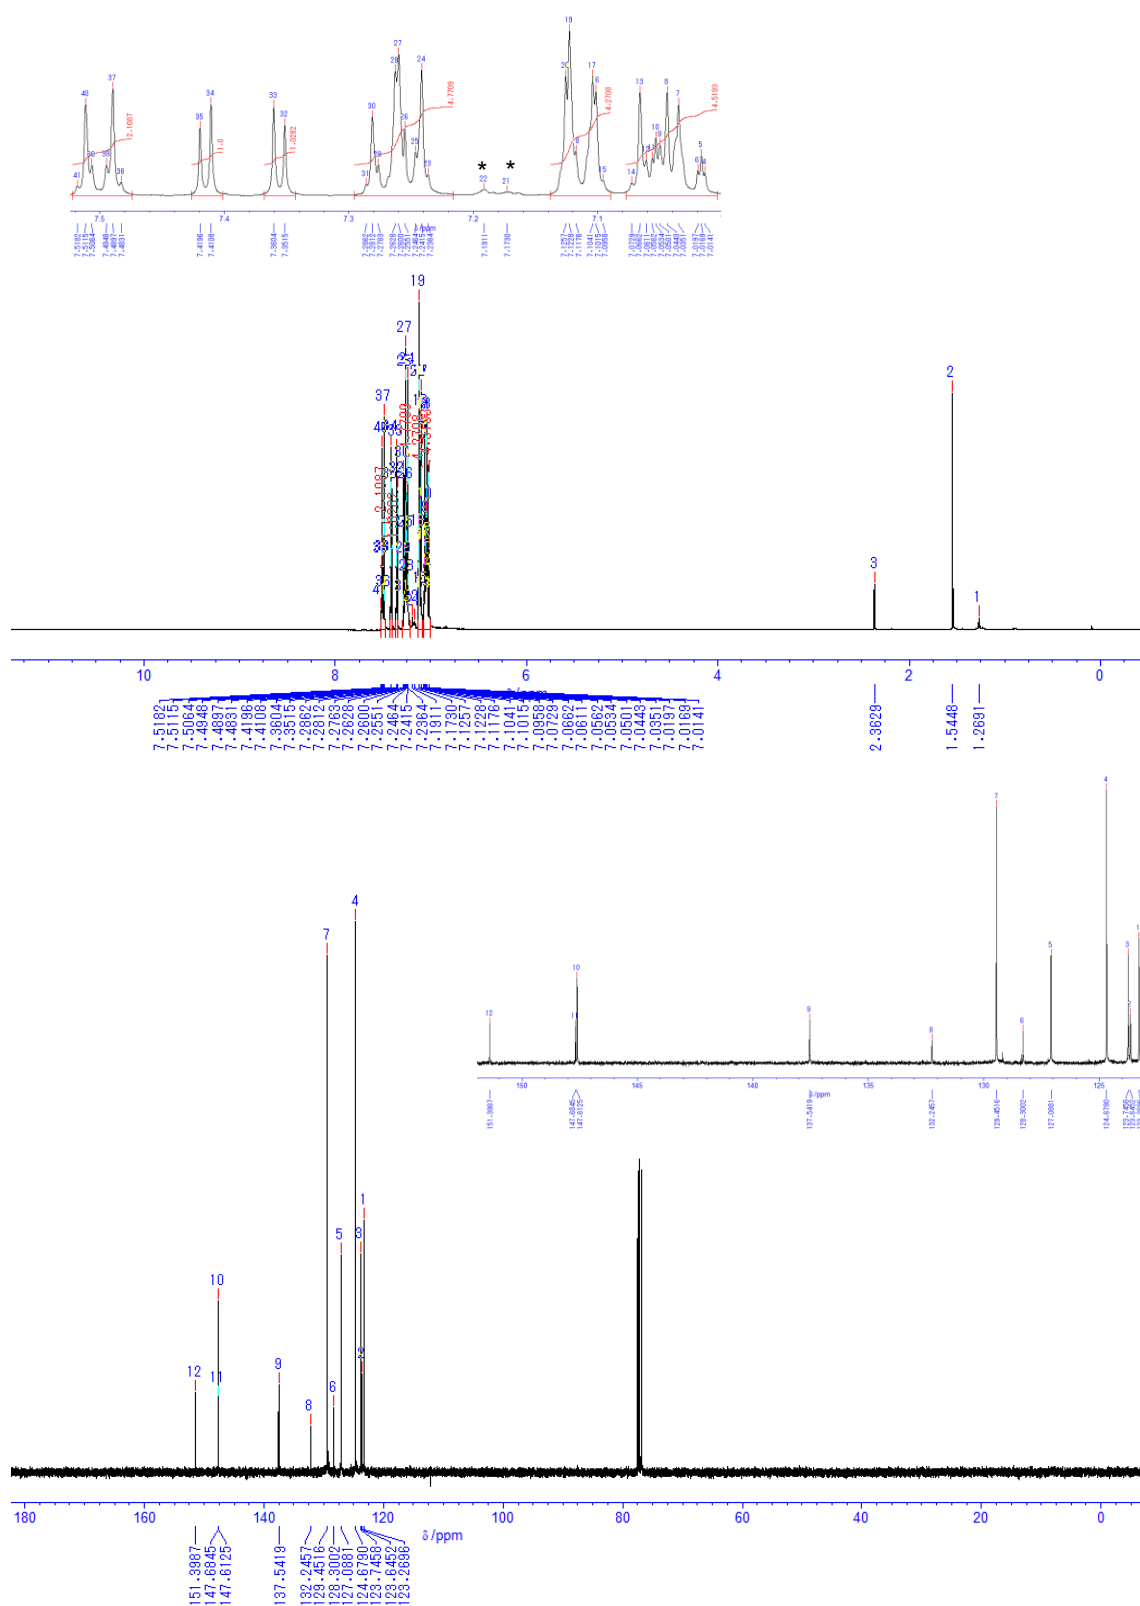

**Figure S4.** <sup>1</sup>H (top) and <sup>13</sup>C NMR spectra (bottom) of **m1** in CDCl<sub>3</sub>. Asterisks in the expanded <sup>1</sup>H NMR spectrum indicate unidentified signals.



**sDTG-tpa**

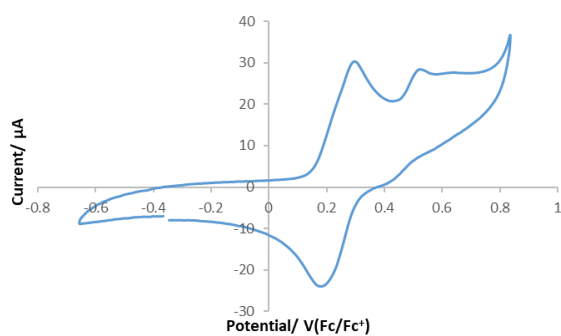

**sDTG-dmap**

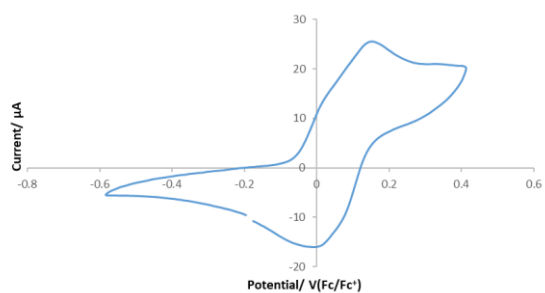

**sDTG-mop**

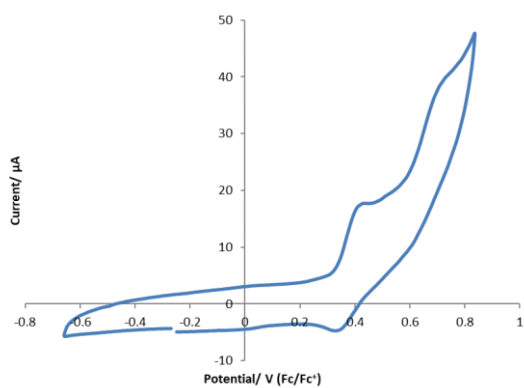

**m1**

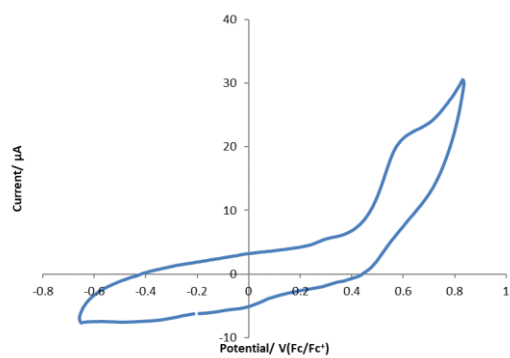

**m2**

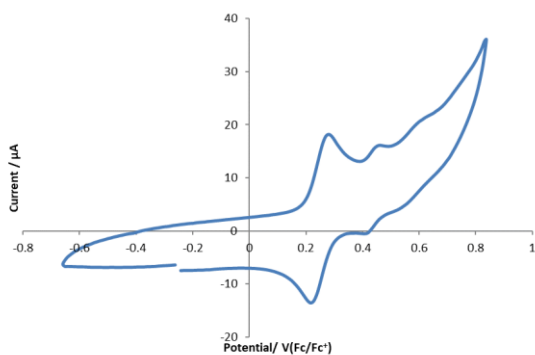

**Figure S6.** Cyclic voltammograms (CVs) of **sDTG-tpa**, **sDTG-dmap**, **sDTG-mop**, **m1**, and **m2**.

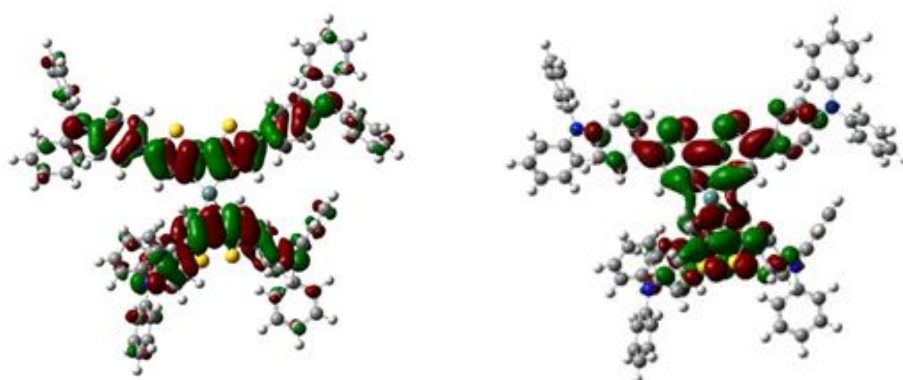

**Figure S7.** HOMO (left) and LUMO (right) profiles of **sDTG-tpa**, derived from DFT calculations at B3LYP/6-31G(d,p).
